# Supplementary material for: Microwave-assisted hydrolysis of phosphonate diesters: an efficient protocol for the preparation of phosphonic acids
Source: Royal Society of Chemistry journal article supplement (doi:10.1039/c2gc35547g), 2012-01-01
Supplement: c2gc35547g.pdf [file c2gc35547g.pdf]

## Microwave-Assisted Hydrolysis of Phosphonates Diesters: An Efficient Protocol for the Preparation of Phosphonic Acids

Petr Jansa,<sup>\*</sup> Ondřej Baszczyński, Eliška Procházková, Martin Dračínský, and Zlatko Janeba<sup>\*</sup>

*Institute of Organic Chemistry and Biochemistry, Academy of Sciences of the Czech Republic,  
v.v.i., Flemingovo nám. 2, CZ-16610 Prague 6, Czech Republic*

[jansa@uochb.cas.cz](mailto:jansa@uochb.cas.cz), [janeba@uochb.cas.cz](mailto:janeba@uochb.cas.cz)

### Supporting information

**General information.** Unless stated otherwise, solvents were evaporated at 40 °C/2 kPa and compounds were dried at 13 Pa. Melting points were determined on a Büchi B-540 and are uncorrected. Analytical TLC was performed on silica gel 60 F<sub>254</sub> plates (Merck). Column chromatography was performed on silica gel 60 µm (Merck). Mass spectra were measured on a LTQ Orbitrap XL (Thermo Fisher Scientific) spectrometer. <sup>1</sup>H NMR and <sup>13</sup>C NMR spectra were recorded on Bruker Avance 500 (<sup>1</sup>H at 500 MHz and <sup>13</sup>C 125.7 MHz) in D<sub>2</sub>O (referenced to dioxane as an internal standard δ = 3.75 ppm and δ = 67.19 ppm, respectively). Complete assignment is based on heteronuclear correlation experiments HSQC and H,C-HMBC. Chemical shifts (δ) are in ppm and coupling constants (J) in Hz. Optical rotations were measured on Autopol IV polarimeter (Rudolph Research Analytical, U.S.A.) at 20 °C, [α]<sub>D</sub> values are given in 10<sup>-1</sup> deg cm<sup>2</sup> g<sup>-1</sup>, concentrations are given in g/100 mL. The purity of compounds was determined by elemental analysis (C, H, N) measured on Perkin–Elmer CHN Analyzer 2400, Series II (Perkin–Elmer). The microwave-assisted (MW-assisted) reactions were carried out in the following MW syntheses instruments: Type I – CEM Discover®, single-mode cavity with focused MW heating (MW power supply 0–300 W, 1 W increments, IR temperature sensor, open or closed vessel mode, pressure range 0–20 bar, 10 ml or 80 ml vials); Type II – Milestone BatchSYNTH®, single-mode cavity, scale-up (MW power supply 0–1000 W, 10 W increments, internal temperature sensor, batch mode, pressure range 0–30 bar, 250 ml vessel); Type III – Milestone FlowSYNTH®, (MW power supply 0–1000 W, 10 W increments, internal temperature sensor, flow mode, pressure range 0–30 bar, 200 mL reaction cell volume, flow rate 10–100 mL/min). Starting phosphonate diesters were synthesized at the Institute of Organic Chemistry and Biochemistry in Prague, Czech Republic.<sup>1,3–9</sup>

### General procedure for the microwave-assisted hydrolysis of phosphonate diesters.

A mixture of the starting phosphonate diester (1.0 mmol) in the aqueous HCl solution (1.0 or 2.0 mmol of 0.5 M or 1.0 M HCl solution) was placed, with a magnetic stirring bar, into 10 mL

reaction tube and sealed. The reaction mixture was heated in the microwave reactor (Type I) at 130-140 °C until constant pressure (20-30 min). The reaction mixture was cooled down to 0 °C and precipitated product was filtered off, washed (water, EtOH, and acetone), and dried *in vacuo*. The products can be crystallized from water for better purity.

**(R)-(((1-(2,6-Diamino-9H-purin-9-yl)propan-2-yl)oxy)methyl)phosphonic acid (9).**<sup>1</sup>

Reaction conditions: a) Microwave reactor Type I, starting compound **1** (1.0 mmol), 130 °C for 10 min, yield 77% of **9**; b) Microwave reactor Type II, starting compound **1** (100.0 mmol), 130°C for 10 min, yield 79% of **9**.

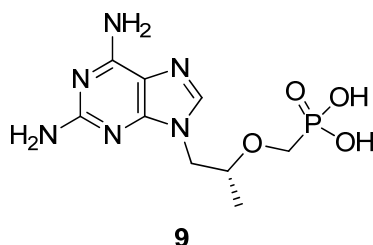

<sup>1</sup>H NMR and <sup>13</sup>C NMR spectra correspond to literature.<sup>1</sup> For C<sub>9</sub>H<sub>15</sub>N<sub>6</sub>O<sub>4</sub>P (302.1) calculated (%): C 35.77; H 5.00; N 27.81; found (%): C 35.54; H 5.23; N 27.59. MS ESI(-), *m/z* (%): 301 [M<sup>-</sup>] (100). Optical purity (99.2 %) was determined by capillary electrophoresis.<sup>2</sup> Chemical purity was determined by X-ray fluorescence analyzer SPECTRO iQ II and confirmed that compound **9** did not contain silicon or any other elements higher than sodium.

**Scale-up for compound 9 under continuous flow conditions:** A mixture of compound **1** (50 mmol, 19.3 g) in the aqueous HCl solution (0.25 M, 400 mL) was heated in the microwave reactor (Type III) at 140 °C at flow rate of 12 mL/min till full conversion. The reaction was monitored by TLC. The reaction mixture was cooled down to 0 °C and precipitated product was filtered off and washed (water). The crude product was crystallized (water), crystals were washed (water, EtOH, and acetone) and dried *in vacuo* to give 10.9 g (72%) of compound **9**.

**((2-(2,6-Diamino-9H-purin-9-yl)ethoxy)methyl)phosphonic acid (10).**<sup>3</sup>

Reaction conditions: Microwave reactor Type I, starting compound **2** (1.0 mmol), 130 °C for 20 min, yield 78% of **10**.

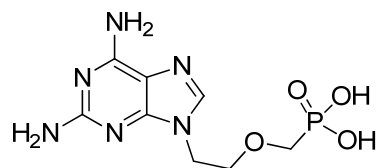

**10**

$^1\text{H}$  NMR and  $^{13}\text{C}$  NMR spectra correspond to literature.<sup>3</sup> For  $\text{C}_8\text{H}_{13}\text{N}_6\text{O}_4\text{P}$  (288.1) calculated (%): C 33.34; H 4.55; N 29.16; found (%): C 33.54; H 4.84; N 29.03. MS ESI(-),  $m/z$  (%): 287 [M<sup>-</sup>] (100).

**(S)-(((1-(2,6-Diamino-9H-purin-9-yl)-3-hydroxypropan-2-yl)oxy)methyl)phosphonic acid (11).**<sup>4</sup>

Reaction conditions: Microwave reactor Type I, starting compound **3** (1.0 mmol), 130 °C for 20 min, yield 77% of **11**.

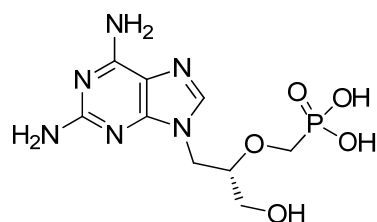

**11**

$^1\text{H}$  NMR and  $^{13}\text{C}$  NMR spectra correspond to literature.<sup>4</sup>  $[\alpha]_{\text{D}} -24.8^\circ$  ( $c$  0.38,  $\text{H}_2\text{O}/\text{NH}_3$ ). For  $\text{C}_9\text{H}_{14}\text{N}_5\text{O}_6\text{P}$  (318.1) calculated (%): C 33.86; H 4.42; N 21.94; found (%): C 33.65; H 4.67; N 21.72. MS ESI(-),  $m/z$  (%): 317 [M<sup>-</sup>] (100).

**((2-(2-Amino-6-oxo-1H-purin-9(6H)-yl)ethoxy)methyl)phosphonic acid (12).**<sup>3</sup>

Reaction conditions: a) Microwave reactor Type I, starting compound **4** (1.0 mmol), 140 °C for 10 min, yield 93 % of **12**; b) Microwave reactor Type II, starting compound **4** (50.0 mmol), 140°C for 10 min, yield 91% of **12**.

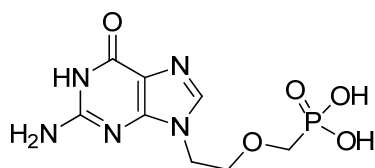

**12**

$^1\text{H}$  NMR and  $^{13}\text{C}$  NMR spectra correspond to literature.<sup>3</sup> For  $\text{C}_8\text{H}_{12}\text{N}_5\text{O}_5\text{P}$  (289.1) calculated (%): C 33.23; H 4.18; N 24.22; found (%): C 33.43; H 4.37; N 24.16. MS ESI(-),  $m/z$  (%): 288 [ $\text{M}^-$ ] (100), 310 [ $\text{M}^- \text{Na}$ ] (21); HRMS ESI(-) calculated ( $m/z$ ): 288.0502; found: 288.0492.

**((2-(6-Amino-9H-purin-9-yl)ethoxy)methyl)phosphonic acid (13).**<sup>5</sup>

Reaction conditions: a) Microwave reactor Type I, starting compound **5** (1.0 mmol), 140 °C for 10 min, yield 92 % of **13**; b) Microwave reactor Type II, starting compound **5** (100.0 mmol), 140°C for 10 min, yield 95% of **13**.

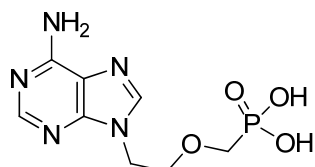

**13**

$^1\text{H}$  NMR and  $^{13}\text{C}$  NMR spectra correspond to literature.<sup>5</sup> For  $\text{C}_8\text{H}_{12}\text{N}_5\text{O}_4\text{P}$  (273.1) calculated (%): C 35.17; H 4.43; N 25.64; found (%): C 35.28; H 4.59; N 25.43. MS ESI(-),  $m/z$  (%): 272 [ $\text{M}^-$ ] (100), 294 [ $\text{M}^- \text{Na}$ ] (17).

**(S)-(((1-(6-Amino-9H-purin-9-yl)-3-hydroxypropan-2-yl)oxy)methyl)phosphonic acid (14).**<sup>6</sup>

Reaction conditions: a) Microwave reactor Type I, starting compound **6** (1.0 mmol), 140 °C for 10 min, yield 88 % of **14**; b) Microwave reactor Type II, starting compound **6** (50.0 mmol), 140°C for 10 min, yield 92% of **14**.

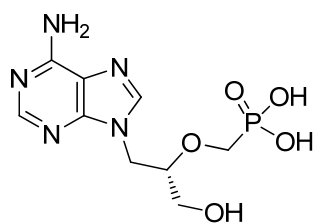

**14**

$^1\text{H}$  NMR and  $^{13}\text{C}$  NMR spectra correspond to literature.<sup>6</sup>  $[\alpha]_{\text{D}} -13.4^\circ$  ( $c$  0.35,  $\text{H}_2\text{O}/\text{NH}_3$ ). For  $\text{C}_9\text{H}_{14}\text{N}_5\text{O}_5\text{P}$  (303.1) calculated (%): C 35.65; H 4.65; N 23.10; found (%): C 35.47; H 4.83; N 23.02. MS ESI(-),  $m/z$  (%): 303  $[\text{M}]^-$  (100).

**(R)-(((1-(6-Amino-9H-purin-9-yl)propan-2-yl)oxy)methyl)phosphonic acid (15).**<sup>7</sup>

Reaction conditions: a) Microwave reactor Type I, starting compound **7** (1.0 mmol), 140 °C for 10 min, yield 91 % of **15**; b) Microwave reactor Type II, starting compound **7** (50.0 mmol), 140°C for 10 min, yield 90 % of **15**.

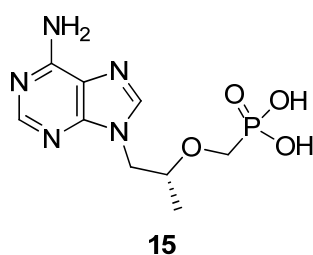

$^1\text{H}$  NMR and  $^{13}\text{C}$  NMR spectra correspond to literature.<sup>7</sup>  $[\alpha]_{\text{D}} -19.2^\circ$  ( $c$  0.5,  $\text{H}_2\text{O}/\text{NH}_3$ ). For  $\text{C}_9\text{H}_{14}\text{N}_5\text{O}_4\text{P}$  (287.1) calculated (%): C 37.64; H 4.91; N 24.38; found (%): C 37.49; H 5.17; N 24.27. MS ESI(-),  $m/z$  (%): 301  $[\text{M}]^-$  (100).

**(R)-(((1-(6-Amino-9H-purin-9-yl)-3-fluoropropan-2-yl)oxy)methyl)phosphonic acid (16).**<sup>8,9</sup>

Reaction conditions: Microwave reactor Type I, starting compound **8** (1.0 mmol), 140 °C for 10 min, yield 93 % of **16**.

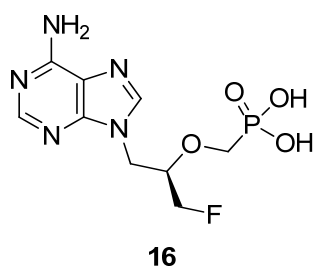

$^1\text{H}$  NMR and  $^{13}\text{C}$  NMR spectra correspond to literature.<sup>8,9</sup>  $[\alpha]_{\text{D}} +8.4^\circ$  ( $c$  0.24,  $\text{H}_2\text{O}/\text{NH}_3$ ). For  $\text{C}_9\text{H}_{13}\text{FN}_5\text{O}_4\text{P}$  (305.1) calculated (%): C 35.42; H 4.29; N 22.95; found (%): C 35.63; H 4.48; N 22.81. MS ESI(-),  $m/z$  (%): 304  $[\text{M}]^-$  (100).

**(*R,S*)-(((1-Fluoro-3-(6-oxo-1*H*-purin-9(6*H*)-yl)propan-2-yl)oxy)methyl)phosphonic acid (23).**<sup>8,9</sup>

Reaction conditions: Microwave reactor Type I, starting compound **17** (1.0 mmol), 140 °C for 10 min, yield 82 % of **23**.

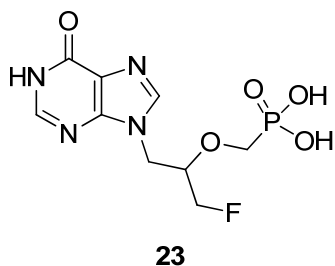

<sup>1</sup>H NMR and <sup>13</sup>C NMR spectra correspond to literature.<sup>8,9</sup> For C<sub>9</sub>H<sub>12</sub>FN<sub>4</sub>O<sub>5</sub>P (306.1) calculated (%): C 35.30; H 3.95; N 18.30; found (%): C 35.43; H 4.20; N 18.17. MS ESI(-), *m/z* (%): 305 [M<sup>-</sup>] (100). HRMS ESI(-) calculated (*m/z*): 305.0451; found: 305.0450.

**(*R*)-(((1-(2-Amino-6-oxo-1*H*-purin-9(6*H*)-yl)-3-fluoropropan-2-yl)oxy)methyl)phosphonic acid (24).**<sup>8,9</sup>

Reaction conditions: Microwave reactor Type I, starting compound **18** (1.0 mmol), 140 °C for 10 min, yield 83 % of **24**.

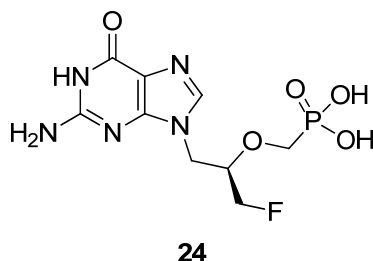

<sup>1</sup>H NMR and <sup>13</sup>C NMR spectra correspond to literature.<sup>8,9</sup> [ $\alpha$ ]<sub>D</sub> +25.3° (*c* 0.3, H<sub>2</sub>O). For C<sub>9</sub>H<sub>13</sub>FN<sub>5</sub>O<sub>5</sub>P (321.1) calculated (%): C 33.65; H 4.08; N 21.80; found (%): C 33.68; H 4.25; N 21.59. MS ESI(-), *m/z* (%): 320 [M<sup>-</sup>] (100).

**((2-(2-Amino-6-oxo-1*H*-purin-9(6*H*)-yl)ethoxy)methyl)phosphonic acid (25).**<sup>3</sup>

Reaction conditions: Microwave reactor Type I, starting compound **19** (1.0 mmol), 140 °C for 10 min, yield 90 % of **25**.

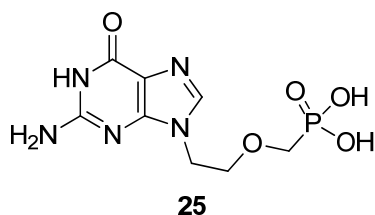

$^1\text{H}$  NMR and  $^{13}\text{C}$  NMR spectra correspond to literature.<sup>3</sup> For  $\text{C}_8\text{H}_{12}\text{N}_5\text{O}_5\text{P}$  (289.1) calculated (%): C 33.23; H 4.18; N 24.22; found (%): C 33.17; H 4.43; N 24.07. MS ESI(-),  $m/z$  (%): 288 [M<sup>-</sup>] (100), 310 [M<sup>-</sup>Na].

**(S)-(((1-(2-Amino-6-oxo-1H-purin-9(6H)-yl)-3-fluoropropan-2-yl)oxy)methyl)phosphonic acid (26).**<sup>8,9</sup>

Reaction conditions: Microwave reactor Type I, starting compound **20** (1.0 mmol), 140 °C for 10 min, yield 85 % of **26**.

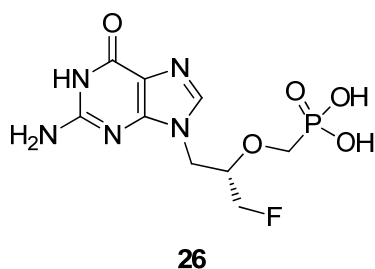

$^1\text{H}$  NMR and  $^{13}\text{C}$  NMR spectra correspond to literature.<sup>8,9</sup>  $[\alpha]_{\text{D}} -26.7^\circ$  ( $c$  0.3,  $\text{H}_2\text{O}$ ). For  $\text{C}_9\text{H}_{13}\text{FN}_5\text{O}_5\text{P}$  (321.1) calculated (%): C 33.65; H 4.08; N 21.80; found (%): C 33.57; H 4.23; N 21.64. MS ESI(-),  $m/z$  (%): 320 [M<sup>-</sup>] (100), 342 [M<sup>-</sup>Na].

**(R,S)-(((3-(2-Amino-6-oxo-1H-purin-9(6H)-yl)-1,1,1-trifluoropropan-2-yl)oxy)methyl)phosphonic acid (27).**

Reaction conditions: a) Microwave reactor Type I, starting compound **21** (1.0 mmol), 140 °C for 10 min, yield 87 % of **27**.

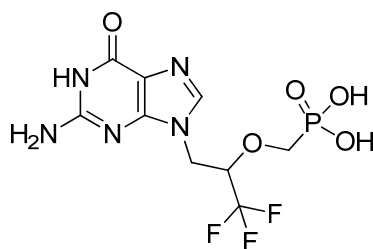

**27**

$^1\text{H}$  NMR ( $\text{D}_2\text{O}$ ): 8.21 s, 1H (H-8''); 4.43 m, 1H (H-1'a); 4.31 – 4.43 m, 2H (H-1'b, H-2'); 3.84 dd, 1H,  $J_{\text{gem}} = 12.5$ ,  $J(1,\text{P}) = 9.6$  a 3.46 dd, 1H,  $J_{\text{gem}} = 12.5$ ,  $J(1,\text{P}) = 9.3$  ( $\text{CH}_2\text{P}$ ).  $^{13}\text{C}$  NMR ( $\text{D}_2\text{O}$ ): 173.46 (C-6''); 156.60 (C-2''); 153.34 (C-4''); 137.67 (C-8''); 123.42 q,  $J(3',\text{F}) = 286.3$  (C-3'); 116.63 (C-5''); 77.58 qd,  $J(2',\text{F}) = 29.6$ ,  $J(2',\text{P}) = 12.7$  (C-2'); 71.24 d,  $J(1,\text{P}) = 153.1$  (C-1); 42.46 (C-1'). For  $\text{C}_9\text{H}_{11}\text{O}_5\text{N}_5\text{F}_3\text{P} + 1.5 \text{H}_2\text{O}$  (348.2) calculated (%): C 24.17; H 4.73; N 15.66; F 12.74; found (%): C 24.34; H 4.82; N 15.55; F 12.90%. MS ESI(-),  $m/z$  (%): 356 [ $\text{M}^-$ ] (100); HRMS ESI(-) calculated ( $m/z$ ): 356.0372; found: 356.0368.

**((2-(2,6-Dioxo-2,3-dihydro-1H-purin-9(6H)-yl)ethoxy)methyl)phosphonic acid (28).**

Reaction conditions: Microwave reactor Type I, starting compound **22** (1.0 mmol), 150 °C for 20 min, yield 80 % of **28**.

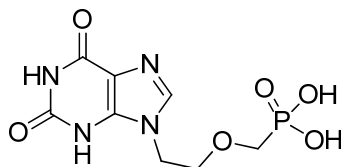

**28**

$^1\text{H}$  NMR ( $\text{D}_2\text{O}$ ): 7.84 s, 1H (H-8''); 4.39 t, 2H,  $J(2',1') = 5.0$  (H-2'); 3.95 t, 2H,  $J(1',2') = 5.1$  (H-1'); 3.80 d, 2H,  $J(1,\text{P}) = 8.5$  ( $\text{CH}_2\text{P}$ ).  $^{13}\text{C}$  NMR ( $\text{D}_2\text{O}$ ): 158.78 (C-6''); 151.53 (C-2''); 141.18 (C-4''); 138.37 (C-8''); 115.97 (C-5''); 71.04 d,  $J(1',\text{P}) = 10.4$  (C-1'); 66.97 d,  $J(1,\text{P}) = 159.8$  ( $\text{CH}_2\text{P}$ ); 44.58 (C-2'). Pro  $\text{C}_8\text{H}_{11}\text{N}_4\text{O}_6\text{P}$  (290.0) vypočteno (%): C 33.11; H 3.82; N 19.31; nalezeno (%): C 33.26; H 4.07; N 19.18. MS ESI(-)  $m/z$  (%): 289 [ $\text{M}^-$ ] (100), 311 [ $\text{M}^-\text{Na}$ ].

**((2-(2-Chloro-6-oxo-1H-purin-9(6H)-yl)ethoxy)methyl)phosphonic acid (29).**

Reaction conditions: Microwave reactor Type I, starting compound **22** (1.0 mmol), 150 °C for 10 min, yield 40 % of **29**.



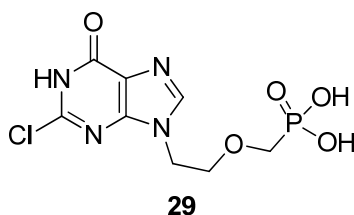

$^1\text{H}$  NMR ( $\text{D}_2\text{O}$ ): 8.05 s, 1H (H-8''); 4.32 m, 2H,  $J(2'-1') = 5.3$  (H-2'); 3.92 m, 2H,  $J(1'-2') = 5.3$  (H-1'); 3.48 d, 2H,  $J(1,\text{P}) = 8.4$  ( $\text{CH}_2\text{P}$ ).  $^{13}\text{C}$  NMR ( $\text{D}_2\text{O}$ ): 168.21 (C-6''); 154.39 (C-2''); 151.28 (C-4''); 141.97 (C-8''); 122.61 (C-5''); 70.73 d,  $J(1'-\text{P}) = 9.9$  (C-1'); 69.53 d,  $J(1,\text{P}) = 150.0$  ( $\text{CH}_2\text{P}$ ); 40.01 (C-2'). Pro  $\text{C}_8\text{H}_{10}\text{ClN}_4\text{O}_5\text{P}$  (308.0077) calculated (%): C 31.13; H 3.27; N 18.15; found (%): C 30.94; H 3.25; N 17.86. MS ESI(-),  $m/z$  (%): 307. 309 [ $\text{M}^-$ ] (100). HRMS ESI(-) calculated ( $m/z$ ): 306.9999; found: 307.0006.

### (2-Chloroethyl)phosphonic acid (**33**).<sup>10</sup>

**Method A:** Reaction conditions: a) Microwave reactor Type I, starting compound **30** (10.0 mmol) and HCl (30 mmol), 100 °C for 10 min, yield 84 % of **33**. b) Microwave reactor Type I, starting compound **30** (10.0 mmol) and HCl (30 mmol), 120 °C for 4 min, yield 87 % of **33**. c) Microwave reactor Type I, starting compound **30** (10.0 mmol) and HCl (30 mmol), 150 °C for 2 min, yield 85 % of **33**.

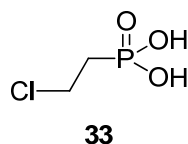

$^1\text{H}$  NMR and NMR according to the literature.<sup>10</sup> For  $\text{C}_2\text{H}_6\text{ClO}_3\text{P}$  (144.0) calculated (%): C 16.62; H 4.19; Cl 24.54; found (%): C 16.53; H 4.32; Cl 24.67. MS ESI(+),  $m/z$  (%): 145 a 147 [ $\text{M}^+$ ] (100).

**Method B:** Reaction conditions: Microwave reactor Type I, starting compound **31** (10.0 mmol) and HCl (30 mmol), 100 °C for 25 min, yield 79 % of **33**.

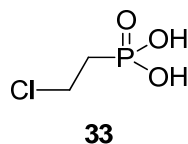

$^1\text{H}$  NMR and  $^{13}\text{C}$  NMR spectra correspond to literature.<sup>10</sup> For  $\text{C}_2\text{H}_6\text{ClO}_3\text{P}$  (144.0) calculated (%): C 16.62; H 4.19; Cl 24.54; found (%): C 16.78; H 4.26; Cl 24.71. MS ESI(+),  $m/z$  (%): 145 a 147 [ $\text{M}^+$ ] (100).

**((2-(6-Amino-9H-purin-9-yl)ethoxy)methyl)phosphonic acid (13).<sup>5</sup>**

Reaction conditions: Microwave reactor Type I, starting compound **32** (1.0 mmol) and HCl (2 mmol), 140 °C for 20 min, yield 78 % of **13**.

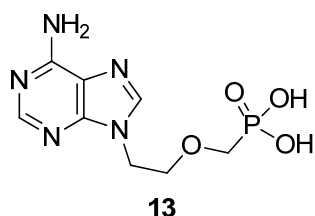

<sup>1</sup>H NMR and <sup>13</sup>C NMR spectra correspond to literature.<sup>5</sup> For C<sub>8</sub>H<sub>12</sub>N<sub>5</sub>O<sub>4</sub>P (273.1) calculated (%): C 35.17; H 4.43; N 25.64; found (%): C 35.35; H 4.60; N 25.38. MS ESI(-), *m/z* (%): 272 [M<sup>-</sup>] (100), 294 [M<sup>-</sup>Na] (14).

**References:**

1. A. Holý and M. Masojídková, *Collect. Czech. Chem. Commun.* 1995, **60**, 1196.
2. V. Šolínová, V. Kašička, P. Sázelová and A. Holý, *Electrophoresis* 2009, **30**, 2245.
3. A. Holý, I. Rosenberg and H. Dvořáková, *Collect. Czech. Chem. Commun.* 1989, **54**, 2190.
4. A. Holý, I. Rosenberg and H. Dvořáková, *Collect. Czech. Chem. Commun.* 1989, **54**, 2470.
5. A. Holý and I. Rosenberg, *Collect. Czech. Chem. Commun.* 1987, **52**, 2801.
6. A. Holý and I. Rosenberg, *Collect. Czech. Chem. Commun.* 1987, **52**, 2775.
7. I. Rosenberg, A. Holý and M. Masojídková, *Collect. Czech. Chem. Commun.* 1988, **53**, 2753.
8. J. Jindřich, A. Holý, H. Dvořáková, *Collect. Czech. Chem. Commun.* 1993, **58**, 1645.
9. O. Baszczyński, P. Jansa, M. Dračinský, B. Klepetářová, A. Holý, I. Votruba, E. de Clercq, J. Balzarini, Z. Janeba, *Bioorg. Med. Chem.* 2011, **19**, 2114.
10. L. Cauret, J. C. Brosse, D. Derouet, H. DeLivonniere, *Synth. Commun.* 1997, **27**, 647.
